# Supplementary material for: Phenotyping and Validation of Root Morphological Traits in Barley (Hordeum vulgare L.)
Source: MDPI journal article supplement (doi:10.3390/agronomy11081583), 2021-08-09
Supplement: s1 [file s1]

## Supplementary Material

Wang, J.; Chen, Y.; Zhang, Y.; Zhang, Y.; Ai, Y.; Feng, Y.; Moody, D.; Diggle, A.; Damon, P.; Rengel, Z. Phenotyping and Validation of Root Morphological Traits in Barley (*Hordeum vulgare* L.). *Agronomy* **2021**, *11*

**Table S1.** List of 189 genotypes of barley (*Hordeum vulgare* L.), and their origins, used in this study

| Code | Name     | Origin*         | Materials                            |
|------|----------|-----------------|--------------------------------------|
| 1    | IGB1320  | AUS/InterGrain  | Semi-advanced and parental materials |
| 2    | IGB1335T | AUS/InterGrain  | Semi-advanced and parental materials |
| 3    | IGB1238  | AUS/InterGrain  | Semi-advanced and parental materials |
| 4    | Vlamingh | AUS/InterGrain  | Semi-advanced and parental materials |
| 5    | Shepherd | AUS/InterGrain  | Semi-advanced and parental materials |
| 6    | IGB1339T | AUS/InterGrain  | Semi-advanced and parental materials |
| 7    | IGB1308  | AUS/InterGrain  | Semi-advanced and parental materials |
| 8    | IGB1217  | AUS/InterGrain  | Semi-advanced and parental materials |
| 9    | IGB1239  | AUS/InterGrain  | Semi-advanced and parental materials |
| 10   | IGB1210T | AUS/InterGrain  | Semi-advanced and parental materials |
| 11   | IGB1324T | AUS/InterGrain  | Semi-advanced and parental materials |
| 12   | IGB1310  | AUS/InterGrain  | Semi-advanced and parental materials |
| 13   | IGB1217  | AUS/InterGrain  | Semi-advanced and parental materials |
| 14   | Publican | Europe/Syngenta | Semi-advanced and parental materials |
| 15   | Wimmera  | AUS/AVS         | Cultivars                            |
| 16   | IGB1307  | AUS/InterGrain  | Semi-advanced and parental materials |
| 17   | Finders  | AUS/InterGrain  | Semi-advanced and parental materials |
| 18   | IGB1427T | AUS/InterGrain  | Semi-advanced and parental materials |
| 19   | IGB1426T | AUS/InterGrain  | Semi-advanced and parental materials |
| 20   | IGB1327T | AUS/InterGrain  | Semi-advanced and parental materials |
| 21   | IGB1305  | AUS/InterGrain  | Semi-advanced and parental materials |
| 22   | Latrobe  | AUS/AVS         | Cultivars                            |
| 23   | IGB1304  | AUS/InterGrain  | Semi-advanced and parental materials |
| 24   | Grout    | AUS/DAFQ        | Cultivars                            |
| 25   | Fathom   | AUS/AU          | Cultivars                            |
| 26   | IGB1431T | AUS/InterGrain  | Semi-advanced and parental materials |
| 27   | Mundah   | AUS/DAFWA       | Cultivars                            |
| 28   | IGB1211  | AUS/InterGrain  | Semi-advanced and parental materials |
| 29   | IGB1432T | AUS/InterGrain  | Semi-advanced and parental materials |
| 30   | IGB1329T | AUS/InterGrain  | Semi-advanced and parental materials |
| 31   | IGB1469  | AUS/InterGrain  | Semi-advanced and parental materials |
| 32   | IGB1240  | AUS/InterGrain  | Semi-advanced and parental materials |
| 33   | Baudin   | AUS/InterGrain  | Semi-advanced and parental materials |
| 34   | Forensic | Europe/Syngenta | Cultivars                            |
| 35   | IGB1338T | AUS/InterGrain  | Semi-advanced and parental materials |

## Supplementary Material

Wang, J.; Chen, Y.; Zhang, Y.; Zhang, Y.; Ai, Y.; Feng, Y.; Moody, D.; Diggle, A.; Damon, P.; Rengel, Z. Phenotyping and Validation of Root Morphological Traits in Barley (*Hordeum vulgare* L.). *Agronomy* **2021**, *11*

**Table S1. Continued**

| Code | Name     | Origin           | Materials                            |
|------|----------|------------------|--------------------------------------|
| 36   | Henley   | Europe/Limagrain | Cultivars                            |
| 37   | IGB1140  | AUS/InterGrain   | Semi-advanced and parental materials |
| 38   | IGB1418T | AUS/InterGrain   | Semi-advanced and parental materials |
| 39   | Skipper  | AUS/AU           | Cultivars                            |
| 40   | Oxford   | Europe/Limagrain | Cultivars                            |
| 41   | IGB1309  | AUS/InterGrain   | Semi-advanced and parental materials |
| 42   | IGB1332  | AUS/InterGrain   | Semi-advanced and parental materials |
| 43   | IGB1323T | AUS/InterGrain   | Semi-advanced and parental materials |
| 44   | IGB1333T | AUS/InterGrain   | Semi-advanced and parental materials |
| 45   | IGB1422T | AUS/InterGrain   | Semi-advanced and parental materials |
| 46   | IGB1419T | AUS/InterGrain   | Semi-advanced and parental materials |
| 47   | IGB1412  | AUS/InterGrain   | Semi-advanced and parental materials |
| 48   | IGB1425T | AUS/InterGrain   | Semi-advanced and parental materials |
| 49   | IGB1416T | AUS/InterGrain   | Semi-advanced and parental materials |
| 50   | IGB1322T | AUS/InterGrain   | Semi-advanced and parental materials |
| 51   | IGB1315  | AUS/InterGrain   | Semi-advanced and parental materials |
| 52   | Quench   | Europe/Syngenta  | Cultivars                            |
| 53   | IGB1303  | AUS/InterGrain   | Semi-advanced and parental materials |
| 54   | IGB1418T | AUS/InterGrain   | Semi-advanced and parental materials |
| 55   | Gairdner | AUS/DAFWA        | Cultivars                            |
| 56   | IGB1321T | AUS/InterGrain   | Semi-advanced and parental materials |
| 57   | Buloke   | AUS/AVS          | Cultivars                            |
| 58   | IGB1456  | AUS/InterGrain   | Semi-advanced and parental materials |
| 59   | IGB1428T | AUS/InterGrain   | Semi-advanced and parental materials |
| 60   | Scope    | AUS/AVS          | Cultivars                            |
| 61   | IGB1404  | AUS/InterGrain   | Semi-advanced and parental materials |
| 62   | IGB1311  | AUS/InterGrain   | Semi-advanced and parental materials |
| 63   | IGB1317  | AUS/InterGrain   | Semi-advanced and parental materials |
| 64   | IGB1331  | AUS/InterGrain   | Semi-advanced and parental materials |
| 65   | IGB1316  | AUS/InterGrain   | Semi-advanced and parental materials |
| 66   | IGB1429T | AUS/InterGrain   | Semi-advanced and parental materials |
| 67   | IGB1467  | AUS/InterGrain   | Semi-advanced and parental materials |
| 68   | IGB1235  | AUS/InterGrain   | Semi-advanced and parental materials |
| 69   | IGB1406  | AUS/InterGrain   | Semi-advanced and parental materials |
| 70   | IGB1414T | AUS/InterGrain   | Semi-advanced and parental materials |

## Supplementary Material

Wang, J.; Chen, Y.; Zhang, Y.; Zhang, Y.; Ai, Y.; Feng, Y.; Moody, D.; Diggle, A.; Damon, P.; Rengel, Z. Phenotyping and Validation of Root Morphological Traits in Barley (*Hordeum vulgare* L.). *Agronomy* **2021**, *11*

**Table S1. Continued**

| Code | Name        | Origin*         | Materials                            |
|------|-------------|-----------------|--------------------------------------|
| 71   | IGB1413T    | AUS/InterGrain  | Semi-advanced and parental materials |
| 72   | IGB1301     | AUS/InterGrain  | Semi-advanced and parental materials |
| 73   | IGB1463     | AUS/InterGrain  | Semi-advanced and parental materials |
| 74   | IGB1212T    | AUS/InterGrain  | Semi-advanced and parental materials |
| 75   | IGB1312     | AUS/InterGrain  | Semi-advanced and parental materials |
| 76   | IGB1302     | AUS/InterGrain  | Semi-advanced and parental materials |
| 77   | IGB1326T    | AUS/InterGrain  | Semi-advanced and parental materials |
| 78   | IGB1337T    | AUS/InterGrain  | Semi-advanced and parental materials |
| 79   | Commander   | AUS/AU          | Cultivars                            |
| 80   | IGB1139     | AUS/InterGrain  | Semi-advanced and parental materials |
| 81   | IGB1328T    | AUS/InterGrain  | Semi-advanced and parental materials |
| 82   | IGB1325T    | AUS/InterGrain  | Semi-advanced and parental materials |
| 83   | Bass        | AUS/InterGrain  | Semi-advanced and parental materials |
| 84   | IGB1214T    | AUS/InterGrain  | Semi-advanced and parental materials |
| 85   | IGB1424T    | AUS/InterGrain  | Semi-advanced and parental materials |
| 86   | IGB1336T    | AUS/InterGrain  | Semi-advanced and parental materials |
| 87   | IGB1319     | AUS/InterGrain  | Semi-advanced and parental materials |
| 88   | IGB1330T    | AUS/InterGrain  | Semi-advanced and parental materials |
| 89   | Propino     | Europe/Syngenta | Cultivars                            |
| 90   | IGB1334T    | AUS/InterGrain  | Semi-advanced and parental materials |
| 91   | 06S334-29   | AUS/InterGrain  | Semi-advanced and parental materials |
| 92   | 07S462-65   | AUS/InterGrain  | Semi-advanced and parental materials |
| 93   | 07S539-39   | AUS/InterGrain  | Semi-advanced and parental materials |
| 94   | 07S543-106  | AUS/InterGrain  | Semi-advanced and parental materials |
| 95   | 08S846-016  | AUS/InterGrain  | Semi-advanced and parental materials |
| 96   | 09S526-119  | AUS/InterGrain  | Semi-advanced and parental materials |
| 97   | 10M73SD-061 | AUS/InterGrain  | Semi-advanced and parental materials |
| 98   | 10S692N-11  | AUS/InterGrain  | Semi-advanced and parental materials |
| 99   | 10S692N-157 | AUS/InterGrain  | Semi-advanced and parental materials |
| 100  | 10S692N-236 | AUS/InterGrain  | Semi-advanced and parental materials |
| 101  | 10S770D-149 | AUS/InterGrain  | Semi-advanced and parental materials |
| 102  | 10S881N-107 | AUS/InterGrain  | Semi-advanced and parental materials |
| 103  | 10S881N-141 | AUS/InterGrain  | Semi-advanced and parental materials |
| 104  | 10S881N-298 | AUS/InterGrain  | Semi-advanced and parental materials |
| 105  | 10S881N-40S | AUS/InterGrain  | Semi-advanced and parental materials |

## Supplementary Material

Wang, J.; Chen, Y.; Zhang, Y.; Zhang, Y.; Ai, Y.; Feng, Y.; Moody, D.; Diggle, A.; Damon, P.; Rengel, Z. Phenotyping and Validation of Root Morphological Traits in Barley (*Hordeum vulgare* L.). *Agronomy* **2021**, *11*

**Table S1. Continued**

| Code | Name           | Origin            | Materials                            |
|------|----------------|-------------------|--------------------------------------|
| 106  | 10S881N-421    | AUS/InterGrain    | Semi-advanced and parental materials |
| 107  | 10S881N-421    | AUS/InterGrain    | Semi-advanced and parental materials |
| 108  | 11M014-013-011 | AUS/InterGrain    | Semi-advanced and parental materials |
| 109  | 11M048HT-019F4 | AUS/InterGrain    | Semi-advanced and parental materials |
| 110  | Compass        | AUS/AU            | Cultivars                            |
| 111  | ETH295B        | Ethiopia/Landrace | Cultivars                            |
| 112  | Gamer          | Europe/Syngenta   | Cultivars                            |
| 113  | IGB1501        | AUS/InterGrain    | Semi-advanced and parental materials |
| 114  | IGB1502        | AUS/InterGrain    | Semi-advanced and parental materials |
| 115  | IGB1503        | AUS/InterGrain    | Semi-advanced and parental materials |
| 116  | IGB1504        | AUS/InterGrain    | Semi-advanced and parental materials |
| 117  | IGB1505        | AUS/InterGrain    | Semi-advanced and parental materials |
| 118  | IGB1506        | AUS/InterGrain    | Semi-advanced and parental materials |
| 119  | IGB1507        | AUS/InterGrain    | Semi-advanced and parental materials |
| 120  | IGB1508        | AUS/InterGrain    | Semi-advanced and parental materials |
| 121  | IGB1509        | AUS/InterGrain    | Semi-advanced and parental materials |
| 122  | IGB1510        | AUS/InterGrain    | Semi-advanced and parental materials |
| 123  | IGB1511        | AUS/InterGrain    | Semi-advanced and parental materials |
| 124  | IGB1512        | AUS/InterGrain    | Semi-advanced and parental materials |
| 125  | IGB1513        | AUS/InterGrain    | Semi-advanced and parental materials |
| 126  | IGB1514        | AUS/InterGrain    | Semi-advanced and parental materials |
| 127  | IGB1515        | AUS/InterGrain    | Semi-advanced and parental materials |
| 128  | IGB1516        | AUS/InterGrain    | Semi-advanced and parental materials |
| 129  | IGB1517        | AUS/InterGrain    | Semi-advanced and parental materials |
| 130  | IGB1519        | AUS/InterGrain    | Semi-advanced and parental materials |
| 131  | IGB1520        | AUS/InterGrain    | Semi-advanced and parental materials |
| 132  | IGB1521        | AUS/InterGrain    | Semi-advanced and parental materials |
| 133  | IGB1522        | AUS/InterGrain    | Semi-advanced and parental materials |
| 134  | IGB1524        | AUS/InterGrain    | Semi-advanced and parental materials |
| 135  | IGB1525        | AUS/InterGrain    | Semi-advanced and parental materials |
| 136  | IGB1526        | AUS/InterGrain    | Semi-advanced and parental materials |
| 137  | IGB1527        | AUS/InterGrain    | Semi-advanced and parental materials |
| 138  | IGB1528        | AUS/InterGrain    | Semi-advanced and parental materials |
| 139  | IGB1529        | AUS/InterGrain    | Semi-advanced and parental materials |
| 140  | IGB1530        | AUS/InterGrain    | Semi-advanced and parental materials |

## Supplementary Material

Wang, J.; Chen, Y.; Zhang, Y.; Zhang, Y.; Ai, Y.; Feng, Y.; Moody, D.; Diggle, A.; Damon, P.; Rengel, Z. Phenotyping and Validation of Root Morphological Traits in Barley (*Hordeum vulgare* L.). *Agronomy* **2021**, *11*

**Table S1. Continued**

| Code | Name          | Origin         | Materials                            |
|------|---------------|----------------|--------------------------------------|
| 141  | IGB1531       | AUS/InterGrain | Semi-advanced and parental materials |
| 142  | IGB1532       | AUS/InterGrain | Semi-advanced and parental materials |
| 143  | IGB1550       | AUS/InterGrain | Semi-advanced and parental materials |
| 144  | IGB1551       | AUS/InterGrain | Semi-advanced and parental materials |
| 145  | IGB1552       | AUS/InterGrain | Semi-advanced and parental materials |
| 146  | IGB1553       | AUS/InterGrain | Semi-advanced and parental materials |
| 147  | IGB1554       | AUS/InterGrain | Semi-advanced and parental materials |
| 148  | IGB1555       | AUS/InterGrain | Semi-advanced and parental materials |
| 149  | IGB1556       | AUS/InterGrain | Semi-advanced and parental materials |
| 150  | IGB1557       | AUS/InterGrain | Semi-advanced and parental materials |
| 151  | IGB1558       | AUS/InterGrain | Semi-advanced and parental materials |
| 152  | IGB1559       | AUS/InterGrain | Semi-advanced and parental materials |
| 153  | IGB1560       | AUS/InterGrain | Semi-advanced and parental materials |
| 154  | IGB1561       | AUS/InterGrain | Semi-advanced and parental materials |
| 155  | IGB1562       | AUS/InterGrain | Semi-advanced and parental materials |
| 156  | IGB1563       | AUS/InterGrain | Semi-advanced and parental materials |
| 157  | IGB1564       | AUS/InterGrain | Semi-advanced and parental materials |
| 158  | IGB1565       | AUS/InterGrain | Semi-advanced and parental materials |
| 159  | IGB1566       | AUS/InterGrain | Semi-advanced and parental materials |
| 160  | IGB1567       | AUS/InterGrain | Semi-advanced and parental materials |
| 161  | IGB1568       | AUS/InterGrain | Semi-advanced and parental materials |
| 162  | IGB1569       | AUS/InterGrain | Semi-advanced and parental materials |
| 163  | IGB1570       | AUS/InterGrain | Semi-advanced and parental materials |
| 164  | IGB1571       | AUS/InterGrain | Semi-advanced and parental materials |
| 165  | IGB1572       | AUS/InterGrain | Semi-advanced and parental materials |
| 166  | IGB1573       | AUS/InterGrain | Semi-advanced and parental materials |
| 167  | IGB1574       | AUS/InterGrain | Semi-advanced and parental materials |
| 168  | IGB1575       | AUS/InterGrain | Semi-advanced and parental materials |
| 169  | Lx09.76-022   | AU/USyd        | Cultivars                            |
| 170  | Lx09.83-019   | AU/USyd        | Cultivars                            |
| 171  | Lx09.98-003   | AU/USyd        | Cultivars                            |
| 172  | NRB120142-007 | AU/DAFQ        | Advanced breeding                    |
| 173  | NRB120444-007 | AU/DAFQ        | Advanced breeding                    |
| 174  | NRB120562     | AU/DAFQ        | Advanced breeding                    |
| 175  | NRB120579-008 | AU/DAFQ        | Advanced breeding                    |

## Supplementary Material

Wang, J.; Chen, Y.; Zhang, Y.; Zhang, Y.; Ai, Y.; Feng, Y.; Moody, D.; Diggle, A.; Damon, P.; Rengel, Z. Phenotyping and Validation of Root Morphological Traits in Barley (*Hordeum vulgare* L.). *Agronomy* **2021**, *11*

**Table S1. Continued**

| Code       | Name          | Origin          | Materials         |
|------------|---------------|-----------------|-------------------|
| <b>176</b> | NRB120766-006 | AU/DAFQ         | Advanced breeding |
| <b>177</b> | NRB120772-012 | AU/DAFQ         | Advanced breeding |
| <b>178</b> | NRB120917-008 | AU/DAFQ         | Advanced breeding |
| <b>179</b> | Sloop_VIC     | AU/AVS          | Cultivars         |
| <b>180</b> | SYN411-291-1  | Europe/Syngenta | Cultivars         |
| <b>181</b> | SYN411-292-2  | Europe/Syngenta | Cultivars         |
| <b>182</b> | SYN412-304-2  | Europe/Syngenta | Cultivars         |
| <b>183</b> | SYN412-308-2  | Europe/Syngenta | Cultivars         |
| <b>184</b> | SYN412-312-1  | Europe/Syngenta | Cultivars         |
| <b>185</b> | SYN412-328    | Europe/Syngenta | Cultivars         |
| <b>186</b> | SYN413-365    | Europe/Syngenta | Cultivars         |
| <b>187</b> | SYN6615-07-1  | Europe/Syngenta | Cultivars         |
| <b>188</b> | VB0611        | AUS/AVS         | Cultivars         |
| <b>189</b> | VB0916        | AUS/AVS         | Cultivars         |

- Region/Breeding Organisation. Abbreviations: AUS = Australia, AVS = Agriculture Victoria Services, AU = Adelaide University, DAFQ = Department of Agriculture and Fisheries Queensland, USyd = University of Sydney, DAFWA = Department of Agriculture and Food Western Australia

## Supplementary Material

Wang, J.; Chen, Y.; Zhang, Y.; Zhang, Y.; Ai, Y.; Feng, Y.; Moody, D.; Diggle, A.; Damon, P.; Rengel, Z. Phenotyping and Validation of Root Morphological Traits in Barley (*Hordeum vulgare* L.). *Agronomy* **2021**, *11*

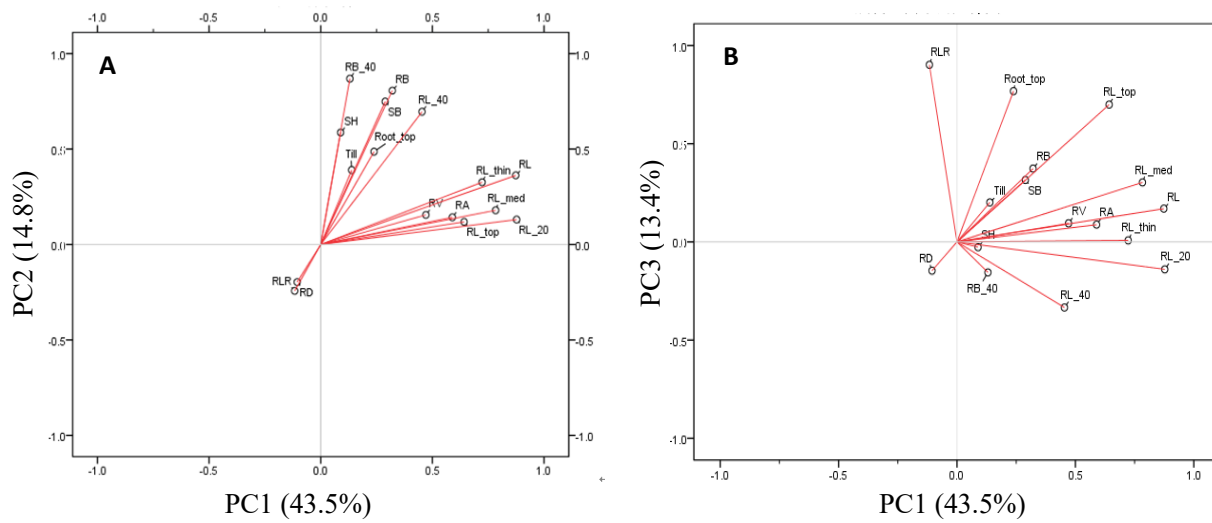

**Figure S1.** Principal component analysis showing the variation of 16 traits in barley germplasm grown in the semi-hydroponic phenotyping system. The position of each trait in 2-D plots is shown for principal component PC2 vs. PC1 presenting 58.3% (A), and PC3 vs. PC1 presenting 56.9% of the total variation (B).

## Supplementary Material

Wang, J.; Chen, Y.; Zhang, Y.; Zhang, Y.; Ai, Y.; Feng, Y.; Moody, D.; Diggie, A.; Damon, P.; Rengel, Z. Phenotyping and Validation of Root Morphological Traits in Barley (*Hordeum vulgare* L.). *Agronomy* **2021**, *11*

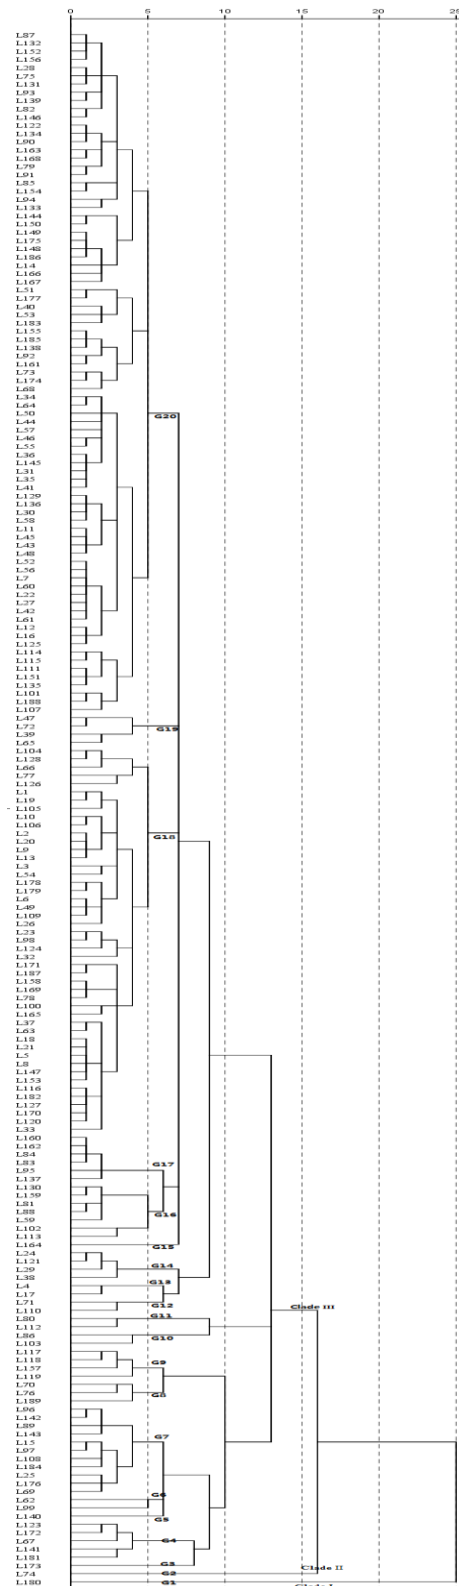

**Figure S2.** Dendrogram of Agglomerative Hierarchical Clustering (AHC) using the Pearson correlation coefficients ( $>0.25$ ) selected from 26 root and shoot traits tested. The 189 genotypes were assigned into one of three general groups (Clade I to Clade III) at rescaled distance of 15.



## Supplementary Material

Wang, J.; Chen, Y.; Zhang, Y.; Zhang, Y.; Ai, Y.; Feng, Y.; Moody, D.; Diggle, A.; Damon, P.; Rengel, Z. Phenotyping and Validation of Root Morphological Traits in Barley (*Hordeum vulgare* L.). *Agronomy* **2021**, *11*

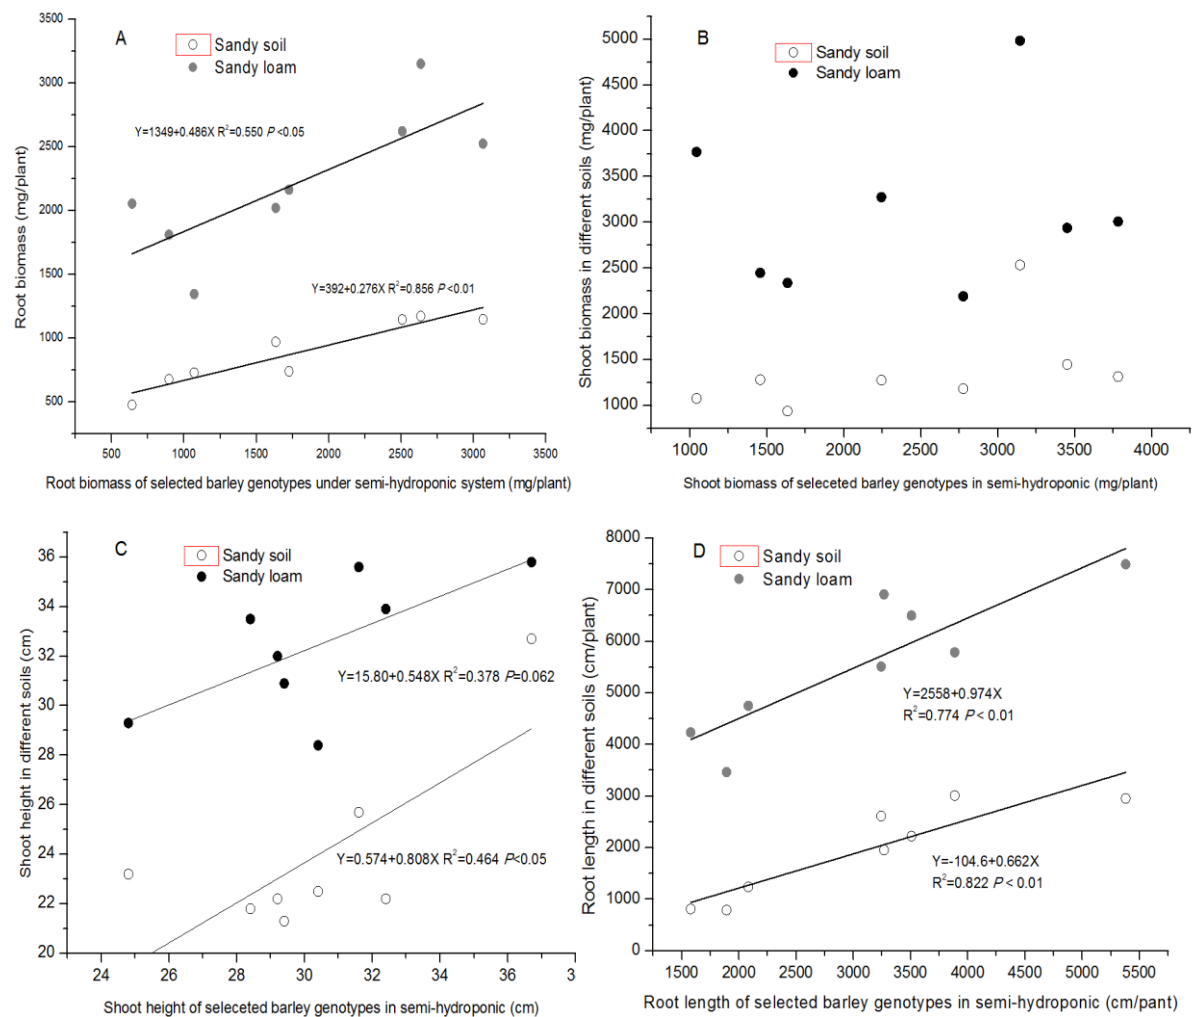

**Figure S3.** Correlations of root biomass (A), shoot biomass (B), shoot height (C) and root length (D) of barley genotypes grown in the semi-hydroponic system vs. the two soils (sandy soil and sandy loam).

## Supplementary Material

Wang, J.; Chen, Y.; Zhang, Y.; Zhang, Y.; Ai, Y.; Feng, Y.; Moody, D.; Diggle, A.; Damon, P.; Rengel, Z. Phenotyping and Validation of Root Morphological Traits in Barley (*Hordeum vulgare* L.). *Agronomy* **2021**, *11*

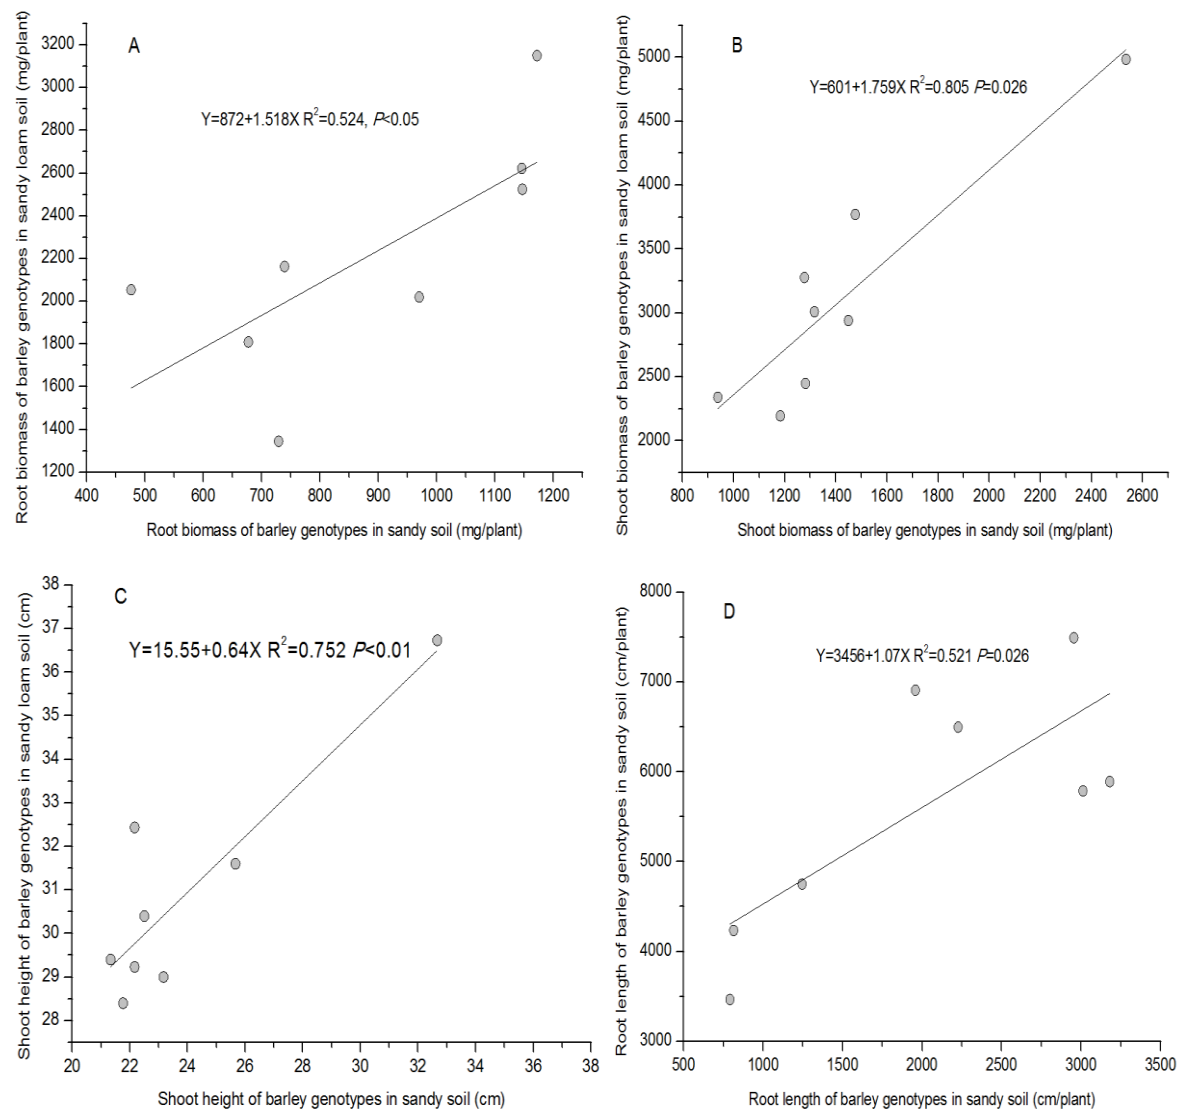

**Figure S4.** Correlations of root biomass (A), shoot biomass (B), shoot height (C) and root length (D) of barley genotypes grown in sandy soil vs. sandy loam.
